# Supplementary material for: Association of the Endothelial Activation and Stress Index with 7‑ Day In‑Hospital Mortality in Sepsis‑Induced Coagulopathy: Evidenc e from a Multicenter Study
Source: Research Square preprint supplement (doi:10.21203/rs.3.rs-7575113/v1), 2025-11-14
Supplement: Supplementary file 1 [file ccab4bddf4bb9f61e30c3a80.docx]

| **items** | **condition** | **point** |
| --- | --- | --- |
| Platelet count (109/L) | < 100 | 2 |
|  | 100 -150 | 1 |
| INR | > 1.4 | 2 |
|  | 1.2 - 1.4 | 1 |
| SOFA score | ≥ 2 | 2 |
|  | 1 | 1 |

**STable 1 diagnosis criteria of sepsis-induced coagulopathy**

| **variable** | **n miss** | **percent miss** |
| --- | --- | --- |
| Ast | 1601 | 19.95 |
| Bilirubin Total | 1583 | 19.73 |
| Ca | 1171 | 14.59 |
| pH | 940 | 11.71 |
| Glucose | 527 | 6.57 |
| PTT | 390 | 4.86 |
| Temperature | 321 | 4.00 |
| Na | 259 | 3.23 |
| Anion gap | 253 | 3.15 |
| K | 242 | 3.02 |
| WBC | 197 | 2.45 |
| Hemoglobin | 190 | 2.37 |
| Bicarbonate | 170 | 2.12 |
| Bun | 140 | 1.74 |
| Chloride | 136 | 1.69 |
| INR | 89 | 1.11 |
| PT | 86 | 1.07 |
| Hematocrit | 44 | 0.55 |
| SBP | 7 | 0.09 |
| DBP | 7 | 0.09 |
| Mbp | 5 | 0.06 |
| Resp Rate | 5 | 0.06 |
| Spo2 | 5 | 0.06 |
| Heart Rate | 4 | 0.05 |

STable 2 Summary of MIMIC-IV database missing data

STable 3 Summary of eICU-CRD missing data

| **variable** | **n miss** | **percent miss** |
| --- | --- | --- |
| Hco3- | 541 | 17.64 |
| Eosinophils | 474 | 15.45 |
| Monocytes | 460 | 15.00 |
| pH | 434 | 14.15 |
| Lymphocytes | 433 | 14.12 |
| pao2 | 429 | 13.99 |
| paco2 | 419 | 13.66 |
| Pt | 381 | 12.42 |
| Ptt | 358 | 11.67 |
| Anion_Gap | 308 | 10.04 |
| Lactate | 288 | 9.39 |
| Apsiii | 277 | 9.03 |
| Glucose_Bedside | 236 | 7.69 |
| Phosphate | 208 | 6.78 |
| Alt | 103 | 3.36 |
| Total_Protein | 77 | 2.51 |
| Admissionweight | 76 | 2.48 |
| Sbp | 64 | 2.09 |
| Dbp | 64 | 2.09 |
| Total Bilirubin | 61 | 1.99 |
| Albumin | 57 | 1.86 |
| AST | 53 | 1.73 |
| Bicarbonate | 44 | 1.43 |
| INR | 39 | 1.27 |
| MBP | 36 | 1.17 |
| Phosphorus | 16 | 0.52 |
| Respiratory Rate | 11 | 0.36 |
| WBC | 6 | 0.20 |
| Ca | 5 | 0.16 |
| Bun | 3 | 0.10 |
| K | 1 | 0.03 |
| Cl | 1 | 0.03 |
